# Supplementary material for: Distinct Genes Related to Drug Response Identified in ER Positive and ER Negative Breast Cancer Cell Lines
Source: PLoS One. 2012 Jul 16;7(7):e40900. doi: 10.1371/journal.pone.0040900 (PMC3397945; doi:10.1371/journal.pone.0040900)
Supplement: Appendix S1 — Meta-analysis algorithm. (DOC) [file pone.0040900.s001.doc]

### Supplement

### Meta-analysis algorithm:

Meta-analysis was performed to identify genes which response to at least 5 drugs in breast cell lines. The procedure was listed as follows:

Let *xgsk* denote the gene expression value of gene *g*, cell line *s* for drug k, *s*, 1≤*g*≤G, 1≤*s*≤S, 1≤*k*≤K. Let *ysk* denote the AUC value for the cell line *s* for drug *k*. The regression coefficient *β1gk* for gene *g* for drug *k* was computed using a standard linear regression model
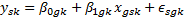
 , where *εsgk* is the normal error. Let where is the standard deviation of

For each drug, we calculated the p-value of each gene by the following steps:

- 1. Compute the t*gk* for gene *g* and drug *k*.
  2. Permute the cell line’s labels for *B* times, and similarly calculate the permuted statistics, *tgk*(*b*), where 1 *≤ g ≤ G,* 1 *≤ k ≤ K,* 1 *≤ b ≤ B.*
  3. Estimate the p-value of *tgk* as and similarly calculate .
  4. Estimate , the proportion of non-DE genes, as [37]. We chose A=[0.5, 1] and thus *l*(*A*)=0.5.
  5. Estimate the q-value of *tgk* as .

Below steps are meta-analysis procedures to identify multi-drug response genes:

1. The rth rand statistic is used for meta-analysis: . Define .
2. Estimate the p-value of the genes in meta-analysis as .
3. Estimate , the proportion of non-DE genes in the meta-analysis, as . We chose A=[0.5, 1] and thus *l*(*A*)=0.5.
4. Estimate the q-value in the meta-analysis as . DE genes detected by the meta-analysis are denoted as . These DE genes are considered as multi-drug response genes in this study.
